# Supplementary material for: A novel critical control point and chemical marker identification method for the multi-step process control of herbal medicines via NMR spectroscopy and chemometrics
Source: Royal Society of Chemistry journal article supplement (doi:10.1039/d0ra03172k), 2020-01-01
Supplement: d0ra03172k1.pdf [file d0ra03172k1.pdf]

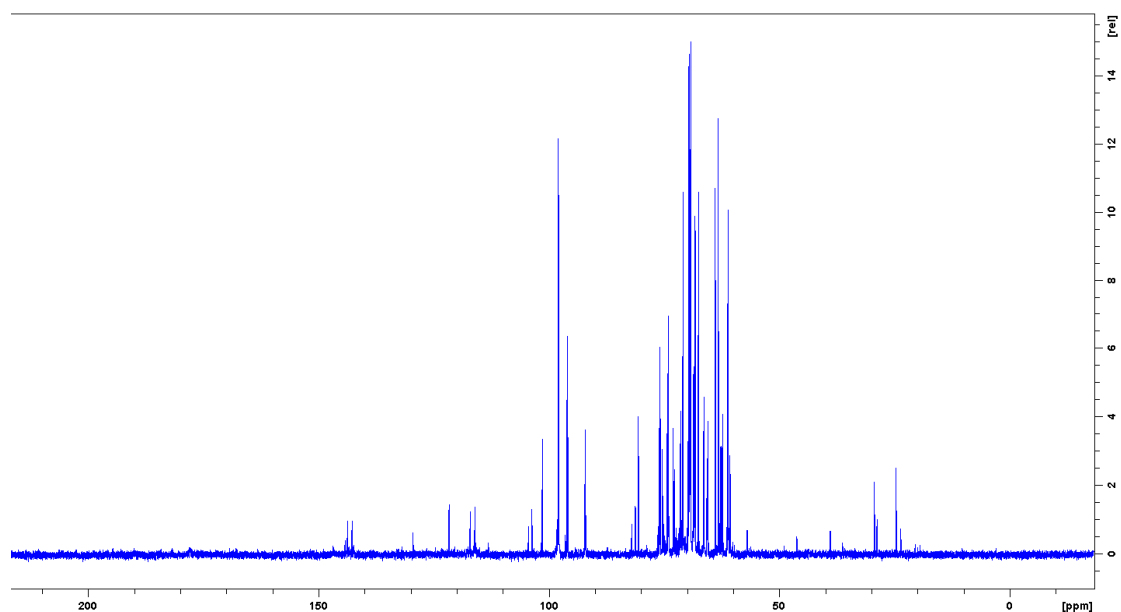

Fig. S1 A representative <sup>13</sup>C NMR spectrum of Danshen water extract solution

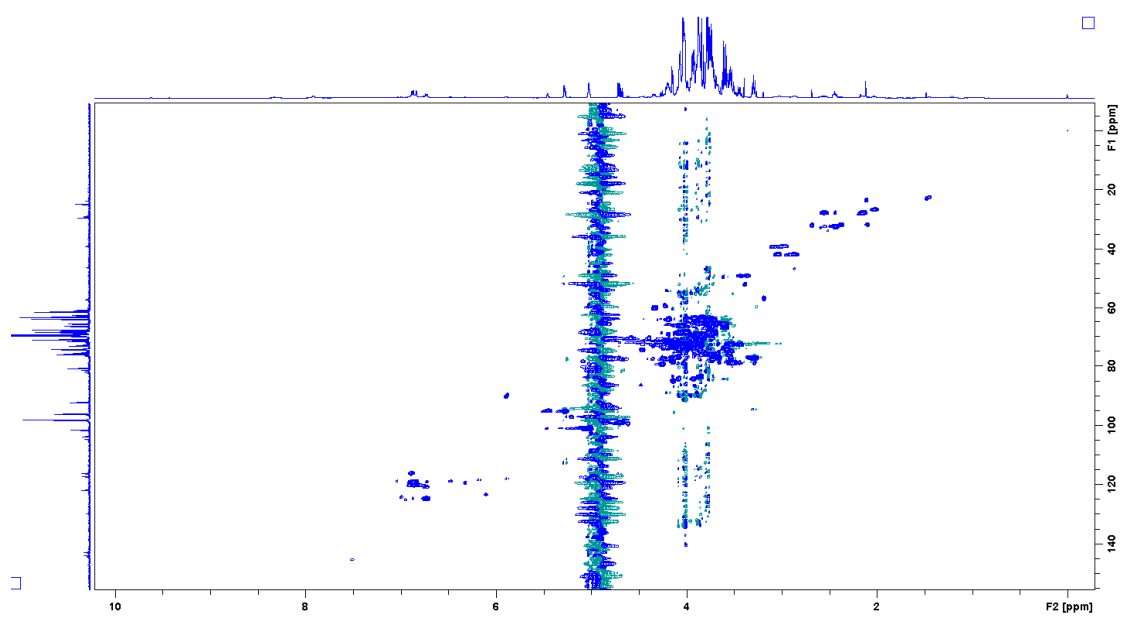

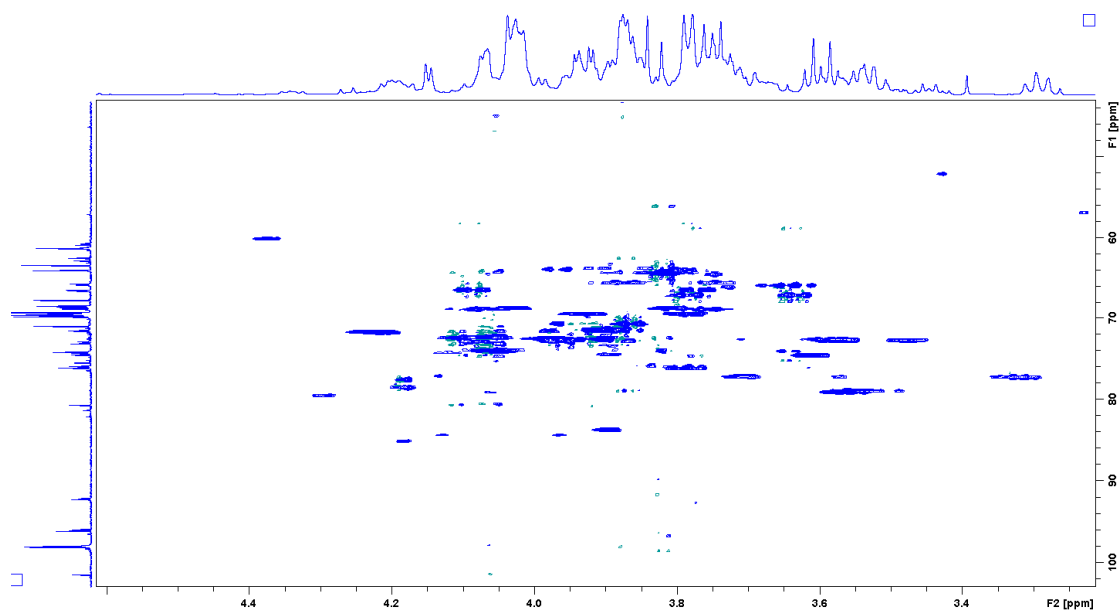

Fig. S2 Representative HSQC NMR spectra of Danshen water extract solution

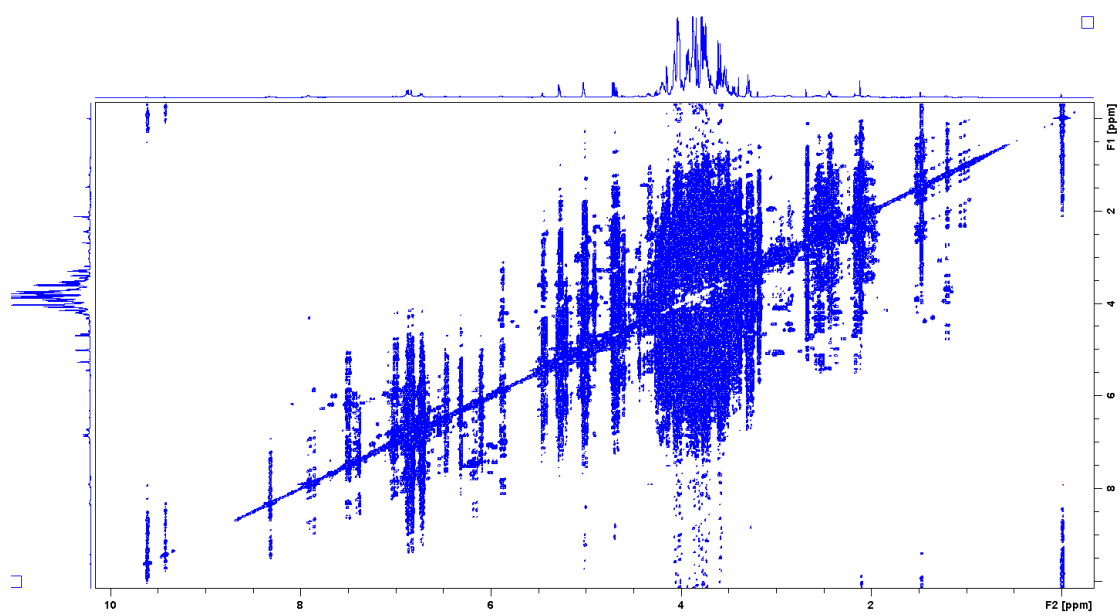

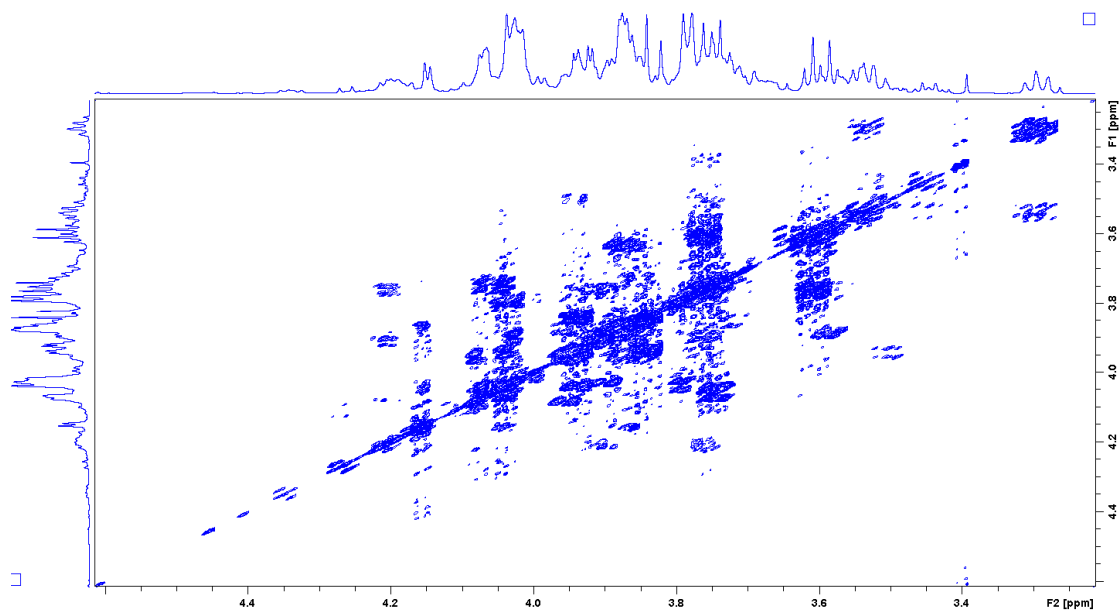

Fig. S3 Representative COSY NMR spectra of Danshen water extract solution

Table S1 Average concentrations of 7 kinds of saccharides in six batches of

|               |       | Danshen extract intermediates A and B |        |
|---------------|-------|---------------------------------------|--------|
|               |       | Concentration                         |        |
| Intermediate  |       | /g·g <sup>-1</sup>                    |        |
|               |       | A                                     | B      |
| Fructose      |       | 21.72                                 | 41.71  |
|               | RSD/% | 24.39                                 | 8.77   |
| Glucose       |       | 10.83                                 | 14.44  |
|               | RSD/% | 23.48                                 | 14.09  |
| Sucrose       |       | 50.65                                 | 2.35   |
|               | RSD/% | 22.22                                 | 34.25  |
| Melibiose     |       | /                                     | 6.13   |
|               | RSD/% | /                                     | 16.78  |
| Raffinose     |       | 24.37                                 | 2.55   |
|               | RSD/% | 11.68                                 | 18.04  |
| Manninotriose |       | 34.66                                 | 102.30 |
|               | RSD/% | 56.60                                 | 10.65  |
| Stachyose     |       | 261.16                                | 18.68  |
|               | RSD/% | 6.05                                  | 64.6   |
